# Supplementary material
Source: MDPI journal article supplement (https://www.mdpi.com/2073-4441/12/5/1251)
Supplement: s1 [file s1]

Article

# *Escherichia coli* Antimicrobial Resistance Variability in Water Runoff and Soil from a Remnant Native Prairie, an Improved Pasture, and a Cultivated Agricultural Watershed

Maitreyee Mukherjee <sup>1,2,\*</sup>, Terry Gentry <sup>1</sup>, Heidi Mjelde <sup>1</sup>, John P. Brooks <sup>3</sup>, Daren Harmel <sup>4</sup>, Lucas Gregory <sup>5</sup> and Kevin Wagner <sup>6</sup>

## Supplementary Materials

| Runoff           |         |             |          | Soil             |         |             |          |
|------------------|---------|-------------|----------|------------------|---------|-------------|----------|
| Tetracycline     | Prairie | Hay Pasture | Cropland | Tetracycline     | Prairie | Hay Pasture | Cropland |
| Prairie          |         | 0.076795    | 0.585012 | Prairie          |         | -           | -        |
| Hay Pasture      |         |             | 1.092761 | Hay Pasture      |         |             | -        |
| Cropland         |         |             |          | Cropland         |         |             |          |
| Cephalothin      | Prairie | Hay Pasture | Cropland | Cephalothin      | Prairie | Hay Pasture | Cropland |
| Prairie          |         | 1.830642    | 0.024796 | Prairie          |         | 8.610186    | 0.815304 |
| Hay Pasture      |         |             | 1.515529 | Hay Pasture      |         |             | 3.317308 |
| Cropland         |         |             |          | Cropland         |         |             |          |
| Ampicillin       | Prairie | Hay Pasture | Cropland | Ampicillin       | Prairie | Hay Pasture | Cropland |
| Prairie          |         | 12.82306    | 5.744888 | Prairie          |         | 2.476985    | 1.355389 |
| Hay Pasture      |         |             | 2.385037 | Hay Pasture      |         |             | 3.895161 |
| Cropland         |         |             |          | Cropland         |         |             |          |
| Sulfamethoxazole | Prairie | Hay Pasture | Cropland | Sulfamethoxazole | Prairie | Hay Pasture | Cropland |
| Prairie          |         | 0.323839    | 1.721975 | Prairie          |         | 0.929684    | 0.466389 |
| Hay Pasture      |         |             | 3.1811   | Hay Pasture      |         |             | -        |
| Cropland         |         |             |          | Cropland         |         |             |          |

**Figure S1.** Chi-square test values for rates of isolate resistance between runoff and soil in sampling sites by antibiotic. A significant difference ( $p < 0.05$ ) between sites existed for test values  $> 3.84$  (critical value for 1 degree of freedom). Orange shaded cells are tests that reported a significant difference in isolate resistance rates for that antibiotic. Blue shaded values were significant after the Chi-square but not after Bonferonni correction. Cells with no value (-) indicate that no isolate resistance was detected at one of the sites.

|             |              |             |            |                  |
|-------------|--------------|-------------|------------|------------------|
| Prairie     | Tetracycline | Cephalothin | Ampicillin | Sulfamethoxazole |
|             | Soil         | Soil        | Soil       | Soil             |
| Runoff      | 16.56303602  | 4.319315895 | 10.8372656 | 0.286197484      |
| Hay Pasture | Tetracycline | Cephalothin | Ampicillin | Sulfamethoxazole |
|             | Soil         | Soil        | Soil       | Soil             |
| Runoff      | 16.91557223  | 0.007681856 | 3.78416611 | 0.893735131      |
| Cropland    | Tetracycline | Cephalothin | Ampicillin | Sulfamethoxazole |
|             | Soil         | Soil        | Soil       | Soil             |
| Runoff      | 6.02259887   | 0.831596308 | 2.98350282 | 2.523639607      |

**Figure S2.** Chi-square test values for rates of isolate resistance runoff vs. soil in all sampling sites for each antibiotic. A significant difference ( $p < 0.05$ ) between sites existed for test values  $> 3.84$  (critical value for 1 degree of freedom). Orange shaded cells are tests that reported a significant difference in isolate resistance rates for that antibiotic. Cells with no value (-) indicate that no isolate resistance was detected at one of the sites.

|             |                 |                 |                 |                 |
|-------------|-----------------|-----------------|-----------------|-----------------|
| Prairie     | $\geq 1$ Agents | $\geq 2$ Agents | $\geq 3$ Agents | $\geq 4$ Agents |
|             | Soil            | Soil            | Soil            | Soil            |
| Runoff      | 2.29741506      | 29.12454773     | 27.1800044      | 27.82703266     |
| Hay Pasture | $\geq 1$ Agents | $\geq 2$ Agents | $\geq 3$ Agents | $\geq 4$ Agents |
|             | Soil            | Soil            | Soil            | Soil            |
| Runoff      | 0.87803539      | 20.40076663     | 28.190339       | -               |
| Cropland    | $\geq 1$ Agents | $\geq 2$ Agents | $\geq 3$ Agents | $\geq 4$ Agents |
|             | Soil            | Soil            | Soil            | Soil            |
| Runoff      | 2.80099945      | 35.35774757     | 38.1291263      | -               |

**Figure S3.** Chi-square test values for rates of isolate MDR runoff vs. soil in all sampling sites. A significant difference ( $p < 0.05$ ) between sites existed for test values  $> 3.84$  (critical value for 1 degree of freedom). Orange shaded cells are tests that reported a significant difference in isolate resistance rates for that antibiotic. Cells with no value (-) indicate that no isolate resistance was detected at one of the sites.

| ≥ 1 Agents    |             | Sampling Site |             |          | ≥ 1 Agents    |             | Sampling Site |             |           |      |
|---------------|-------------|---------------|-------------|----------|---------------|-------------|---------------|-------------|-----------|------|
|               |             | Prairie       | Hay Pasture | Cropland |               |             | Prairie       | Hay Pasture | Cropland  |      |
| Sampling Site | Prairie     |               | 1.000467926 | 0.06     | Sampling Site | Prairie     |               | 8.61018634  | 0.82      |      |
|               | Hay Pasture |               |             | 1.52     |               | Hay Pasture |               |             |           | 3.32 |
|               | Cropland    |               |             |          |               | Cropland    |               |             |           |      |
| ≥ 2 Agents    |             | Sampling Site |             |          | ≥ 2 Agents    |             | Sampling Site |             |           |      |
|               |             | Prairie       | Hay Pasture | Cropland |               |             | Prairie       | Hay Pasture | Cropland  |      |
| Sampling Site | Prairie     |               | 1.75        | 4.85     | Sampling Site | Prairie     |               | 2.18        | 1.4391429 |      |
|               | Hay Pasture |               |             | 0.71     |               | Hay Pasture |               |             |           | 3.90 |
|               | Cropland    |               |             |          |               | Cropland    |               |             |           |      |
| ≥ 3 Agents    |             | Sampling Site |             |          | ≥ 3 Agents    |             | Sampling Site |             |           |      |
|               |             | Prairie       | Hay Pasture | Cropland |               |             | Prairie       | Hay Pasture | Cropland  |      |
| Sampling Site | Prairie     |               | 3.853983653 | 0.00055  | Sampling Site | Prairie     |               | 0.92968421  | 0.46639   |      |
|               | Hay Pasture |               |             | 4.03     |               | Hay Pasture |               |             |           | -    |
|               | Cropland    |               |             |          |               | Cropland    |               |             |           |      |
| ≥ 4 Agents    |             | Sampling Site |             |          | ≥ 4 Agents    |             | Sampling Site |             |           |      |
|               |             | Prairie       | Hay Pasture | Cropland |               |             | Prairie       | Hay Pasture | Cropland  |      |
| Sampling Site | Prairie     |               | 0.99        | 1.12     | Sampling Site | Prairie     |               | -           | -         |      |
|               | Hay Pasture |               |             | ~        |               | Hay Pasture |               |             |           | -    |
|               | Cropland    |               |             |          |               | Cropland    |               |             |           |      |

**Figure S4.** Chi-square test values for rates of isolate MDR between all sampling sites within runoff and soil isolates. A significant difference ( $p < 0.05$ ) between sites existed for test values  $> 3.84$  (critical value for 1 degree of freedom). Orange shaded cells are tests that reported a significant difference in isolate resistance rates for that antibiotic. Cells with no value (-) indicate that no isolate resistance was detected at one of the sites.

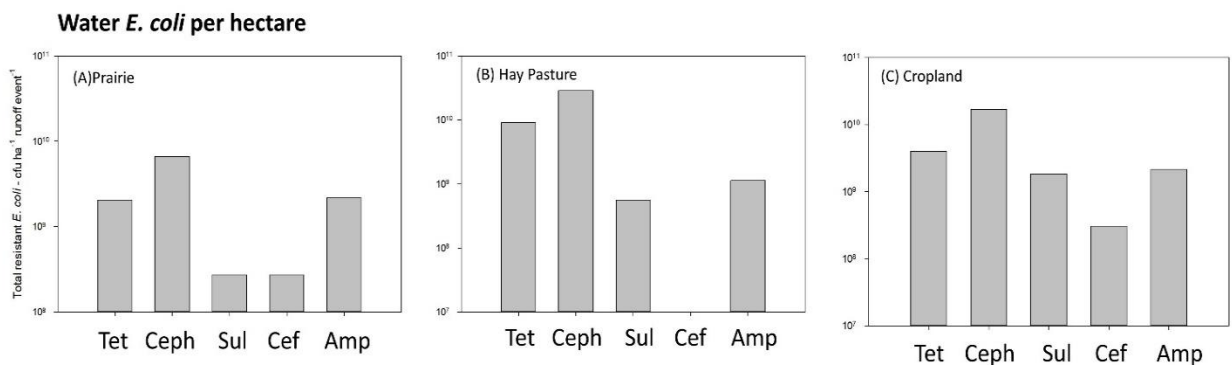

**Figure S5.** Total antibiotic resistant *E. coli* (cfu) observed within each of the three sites, (A) Prairie, (B) Pasture and (C) Cropland in water runoff per rainfall event per hectare. Tet – Tetracycline, Ceph – Cephalothin, Sul – Sulfamethoxazole, Cef – Cefoperazone, Amp – Ampicillin.

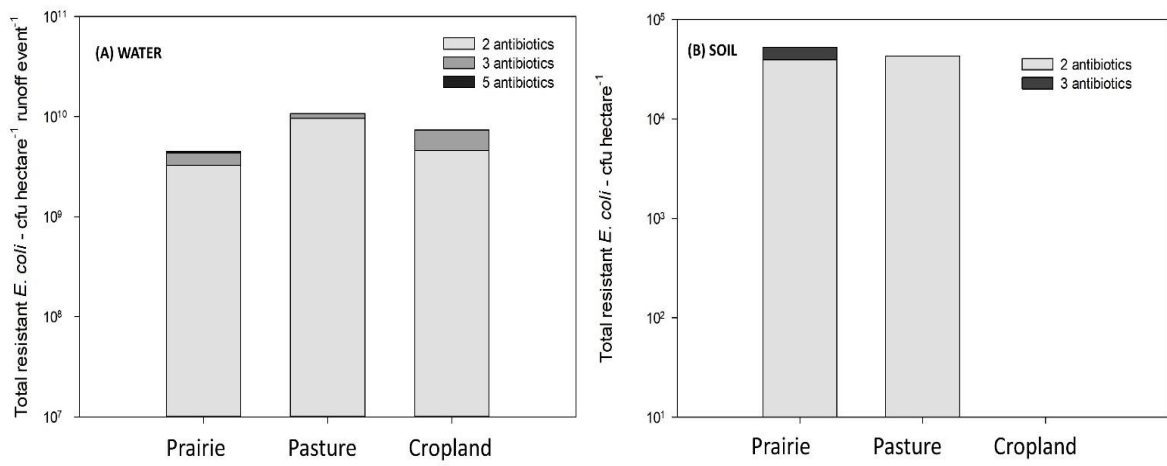

**Figure S6.** Total multidrug resistant (MDR) *E. coli* (cfu) observed, **(A)** per hectare per rainfall event (runoff) and **(B)** per hectare of soil within each of the three sites Prairie, Pasture and Cropland.
